1 The association of DNA methylation with body mass index: distinguishing  
2 between predictors and biomarkers

3 Zoe E. Reed<sup>1\*</sup>, Matthew J. Suderman<sup>1</sup>, Caroline L. Relton<sup>1</sup>, Oliver S.P. Davis<sup>1,2</sup>,  
4 Gibran Hemani<sup>1</sup>

5 1 Medical Research Council Integrative Epidemiology Unit (MRC IEU), Department of  
6 Population Health Sciences, Bristol Medical School, University of Bristol, UK

7 2 The Alan Turing Institute, British Library, 96 Euston Road, London, UK

8 \*Corresponding author ([zoe.reed@bristol.ac.uk](mailto:zoe.reed@bristol.ac.uk))

9

10

11

12

13

14

15

16

17 **Abstract**

18 **Background:**

19 DNA methylation is associated with body mass index (BMI), but it is not clear if  
20 methylation scores are biomarkers for extant BMI, or predictive of future BMI.  
21 Here we explore the causal nature and predictive utility of DNA methylation  
22 measured in peripheral blood with BMI and cardiometabolic traits.

23 **Methods:**

24 Analyses were conducted across the life course using the ARIES cohort of  
25 mothers (n=792) and children (n=906), for whom DNA methylation and genetic  
26 profiles and BMI at multiple time points (3 in children at birth, in childhood and  
27 in adolescence, 2 in mothers during pregnancy and in middle age) were  
28 available. Genetic and DNA methylation scores for BMI were derived using  
29 published associations between BMI and DNA methylation and genotype. Causal  
30 relationships between methylation and BMI were assessed using Mendelian  
31 randomisation and cross-lagged models.

32 **Results:**

33 The DNA methylation scores in adult women explained 10% of extant BMI  
34 variance. However, less extant variance was explained by scores generated in the  
35 same women during pregnancy (2% BMI variance) and in older children (15-17  
36 years; 3% BMI variance). Similarly, little extant variance was explained in  
37 younger children (at birth and at 7 years; 1% and 2%, respectively). These

38 associations remained following adjustment for smoking exposure and  
39 education levels. The DNA methylation score was found to be a poor predictor of  
40 future BMI using linear and cross-lagged models, suggesting that DNA  
41 methylation variation does not cause later variation in BMI. However, there was  
42 some evidence to suggest that BMI is predictive of later DNA methylation.  
43 Mendelian randomisation analyses also support this direction of effect, although  
44 evidence is weak. Finally, we find that DNA methylation scores for BMI are  
45 associated with extant cardiometabolic traits independently of BMI and genetic  
46 score.

47 **Conclusion:**

48 The age-specific nature of DNA methylation associations with BMI, lack of causal  
49 relationship, and limited predictive ability of future BMI, indicate that DNA  
50 methylation is likely influenced by BMI and might more accurately be considered  
51 a biomarker of BMI and related outcomes than a predictor. Future epigenome-  
52 wide association studies may benefit from further examining associations  
53 between early DNA methylation and later health outcomes.

54 **Keywords:** BMI - DNA methylation - ALSPAC - ARIES - Longitudinal - Mendelian  
55 randomization

56

57

58

## 59 **Background**

60 Obesity has a considerable burden on healthcare and has been shown to be  
61 predictive of mortality [1]. In recent years there has been a gradual increase in  
62 body mass index (BMI) in many countries [2] and interventions to decrease BMI  
63 have had limited success [3,4]. Predicting BMI early on and performing targeted  
64 interventions is an alternative strategy that could be more effective.

65 The aetiology of BMI comprises both genetic and environmental factors, with  
66 heritability likely below 0.5 [5,6]. It has been suggested that natural variation in  
67 DNA methylation levels may be a risk factor for certain diseases and play a role  
68 in the phenotypic variation of many traits [7–9]. In some cases, DNA methylation  
69 may provide the molecular link between environmental factors and associated  
70 disease risk, for example, recent studies have suggested that DNA methylation  
71 may be the mechanism allowing environmental factors or increased BMI to lead  
72 to obesity-related health outcomes [10–12]. Therefore, it could be useful as a  
73 predictor of such health outcomes.

74 Recent studies [13–15] suggest that DNA methylation associates with BMI trait  
75 variance independent of genetic variation. Associated genes have been shown to  
76 be involved in processes such as metabolism, inflammation, metabolic disease  
77 and cardiovascular disease amongst others. This suggests that associated DNA  
78 methylation loci may belong to causal pathways linking BMI and metabolic,  
79 cardiovascular and other obesity-related health outcomes, but this requires  
80 further exploration.

81 Since genetic variants are fixed at conception, genetic variants associated with  
82 BMI can be used early in life to predict later BMI [16]. The relationship of DNA  
83 methylation at BMI associated loci, however, is more complex. Methylation levels  
84 vary over time and may change in response to environmental or phenotypic  
85 changes so earlier methylation variation is not guaranteed to predict later BMI  
86 levels. Recent work [14] has suggested that change in BMI is more likely to be  
87 causal for changes in DNA methylation than vice versa. This would suggest that  
88 current DNA methylation scores are simply *biomarkers* for extant BMI. However,  
89 the utility of DNA methylation as a *predictor* for future trajectories of BMI would  
90 be of considerably greater utility.

91 The first aim of our study was to investigate if there is a temporal association  
92 between DNA methylation and BMI. We approached this question by using  
93 genome-wide DNA methylation profiles from the Accessible Resource for  
94 Integrated Epigenomics Studies (ARIES) [17] subset of the Avon Longitudinal  
95 Study of Parents and Children (ALSPAC) [18,19]. ALSPAC is a prospective cohort  
96 of children born in the former county of Avon, England during 1991 and 1992.  
97 DNA methylation profiles were generated in children from blood collected at  
98 three time points (birth, childhood, adolescence) and from their mothers at two  
99 time points (during pregnancy and at middle-age). We used these DNA  
100 methylation profiles along with multiple measurements of BMI genetic profiles  
101 to determine if DNA methylation predicted BMI later in life, independently of  
102 genetic variation and BMI itself, and vice versa. In doing so, our objective was to  
103 determine if DNA methylation is a predictor for BMI or simply a biomarker that  
104 proxies current or previous BMI values.

105 DNA methylation scores for BMI may be useful for the detection of adverse  
106 health outcomes related to BMI. For example, *Wahl et al* found that DNA  
107 methylation could be used to identify individuals at high risk of incident type 2  
108 diabetes, independently of other explanatory factors, including BMI itself [14].  
109 Therefore, the second aim of our study was to see if DNA methylation scores for  
110 BMI contributed anything above BMI itself in predicting related adverse health  
111 outcomes.

112

113

114

115

116

117

118

119

120

121

122

## 123 **Methods**

### 124 Cohort description

125 We used children and mothers data from the Avon Longitudinal Study of Parents  
126 and Children (ALSPAC) cohort in this study [18,19]. The ALSPAC cohort is a  
127 prospective birth cohort study in which 14,541 pregnant women living in Avon,  
128 UK, with an expected delivery date from 1st April 1991 to the 31st December  
129 1992 were initially recruited. Of these, 13,988 children were still alive 1 year  
130 later and have been followed-up with regular questionnaires and clinical  
131 measures, providing behavioural, lifestyle and biological data. When the children  
132 were approximately 7 years of age, an attempt was made to bolster the initial  
133 sample with eligible cases who had failed to join the study originally. As a result,  
134 when considering variables collected after age 7, the total sample size for those  
135 alive at 1 year of age is 14,901. The study website contains details of all the data  
136 that is available through a fully searchable data dictionary and variable search  
137 tool <http://www.bristol.ac.uk/alspac/researchers/our-data/>.

138 We only included participants that were also in the sub-study Accessible  
139 Resource for Integrated Epigenomic Studies (ARIES), where methylation data  
140 was available for these individuals [17]. After excluding those without  
141 methylation or phenotypic data and those that had withdrawn consent, we had  
142 data available for analyses from 823 children at birth, 906 for childhood (age 7),  
143 770 for adolescence (age 15) and 792 for pregnant mothers and 726 for middle-  
144 aged mothers. The mean age and BMI are presented in **Table 1**. Sex is also  
145 included for children only, as adults were all female.

146 Table 1. Cohort description

|                                                                | Children            |                      |                        | Mothers              |                       |
|----------------------------------------------------------------|---------------------|----------------------|------------------------|----------------------|-----------------------|
|                                                                | Birth<br>(n=823)    | Childhood<br>(n=906) | Adolescence<br>(n=770) | Pregnancy<br>(n=792) | Middle-age<br>(n=726) |
| <b>Mean age in years (SD)</b>                                  | NA                  | 7.45 (0.15)          | 17.35 (0.88)           | 28.87<br>(4.30)      | 47.66<br>(4.26)       |
| <b>Percentage of females</b>                                   | 51.03%              | 50.44%               | 53.38%                 | 100%                 | 100%                  |
| <b>Mean BMI (kg/m<sup>2</sup>) or birthweight (grams) (SD)</b> | 3490.93<br>(477.76) | 16.20<br>(2.04)      | 22.58 (3.83)           | 22.72<br>(3.63)      | 26.41<br>(5.09)       |

147 *SD = Standard Deviation, BMI= Body Mass Index*

148 Ethics

149 Ethical approval for the study was obtained from the ALSPAC Ethics and Law

150 Committee and the Local Research Ethics Committees. Informed consent for the

151 use of data collected via questionnaires and clinics was obtained from

152 participants following the recommendations of the ALSPAC Ethics and Law

153 Committee at the time.

154 Phenotypic measures

155 The time points investigated in this study are pregnancy and middle-age data for

156 the mothers and birth, childhood (age 7) and adolescence (age 15-17 for

157 methylation data and age 17 for BMI data) data for the children.

158 Measures of height and weight were collected at research clinic visits. Height

159 was measured to the nearest millimetre using the Harpenden Stadiometer.



160 Weight was measured using the Tanita Body Fat Analyser to the nearest 50g.  
161 BMI was calculated by dividing weight (kilograms) by height (meters) squared  
162 ( $\text{kg}/\text{m}^2$ ). For measurements at birth, birth weight was collected and is used here  
163 instead of BMI.

164 Data for smoking and highest education level of mothers, age, sex, sample type  
165 and cell type proportions (B cell, CD4T, CD8T, Gran, Mono and NK) were used as  
166 covariates in analyses (for children, information on matched mothers smoking  
167 and maternal education were used). Various answers from questions regarding  
168 smoking in mothers (in pregnancy and currently) were used, from questionnaire  
169 data. These included the number of cigarettes smoked per day before pregnancy,  
170 during the first three months of pregnancy and the number of cigarettes smoked  
171 in the last 2 weeks during or just after pregnancy. These measures were  
172 combined to create a variable for whether the mother smoked in pregnancy. We  
173 also used data on the number of cigarettes smoked per day, whether they  
174 responded as being a current smoker and the time passed since they stopped  
175 smoking if this was within the last 12 months to create a variable for current or  
176 recent (within the last 12 months) smoker. Education level for the mother's was  
177 also taken from questionnaire data, where participants were asked "What  
178 educational qualifications do you, your partner, your mother, and your father  
179 have?". They were asked to select all options that applied to them and we used  
180 the highest education qualification for the participant. The options for this were  
181 CSE/none, vocational, O level, A level or degree.

182 Variables for cardiovascular outcomes for middle-aged mothers and adolescents  
183 were also used. These variables were from blood samples, obtained during clinic

184 visits and included fasting glucose and insulin, triglycerides and low-density  
185 lipoprotein (LDL). Sitting diastolic and systolic blood pressures (SBP) from the  
186 right arm were collected during clinic visits. An Omron M6 upper arm blood  
187 pressure/pulse monitor was used to take 2 readings of blood pressure and then  
188 mean values were used. The data for triglycerides, glucose and insulin were  
189 skewed so we log transformed this data for use in analyses.

#### 190 Methylation data

191 Methylation profiling in the ARIES subset was conducted using DNA samples  
192 from blood taken at clinic visits or after delivery from the umbilical cord in the  
193 case of the birth time point. Blood from 1,018 mother-child pairs (children at  
194 three time points and their mothers at two time points) were selected for  
195 analysis as part of the Accessible Resource for Integrative Epigenomic Studies  
196 (ARIES, <http://www.ariesepigenomics.org.uk/>) [17]. Following DNA extraction,  
197 samples were bisulphite converted using the Zymo EZ DNA Methylation™ kit  
198 (Zymo, Irvine, CA, USA). Following conversion, genome-wide methylation was  
199 measured using the Illumina Infinium HumanMethylation450 (HM450)  
200 BeadChip. The arrays were scanned using an Illumina iScan, with initial quality  
201 review using GenomeStudio. ARIES data were pre-processed and normalised  
202 using the *meffil* R package [20]. ARIES consists of 5,469 DNA methylation profiles  
203 obtained from 1,022 mother-child pairs measured at five time points. Low  
204 quality profiles were removed from further processing, and the remaining 4,593  
205 profiles were normalised using the Functional Normalization algorithm [21]  
206 with the top 10 control probe principal components. From the ARIES dataset,  
207 sample type and normalised methylation data was extracted and cell type

208 proportion data were estimated using the Houseman method [22]. Full details of  
209 the pre-processing and normalization of ARIES has been described previously  
210 [20].

### 211 Genotyping

212 Genetic data were collected from blood samples obtained in clinic visits.  
213 Genotyping was conducted with the Illumina HumanHap550 quad chip for  
214 children and the Illumina human660W-quad array for mothers. Quality control  
215 measures were carried out and haplotypes estimated using ShapeIT. A phased  
216 version of the 1000 genomes reference panel from the Impute2 reference data  
217 repository was used and Imputation of the target data was performed with this,  
218 using all reference haplotypes. A large proportion of the cohort has genome-wide  
219 data from these samples and a subset of this data is used in this study [18].

### 220 Genetic and epigenetic scores

221 To investigate whether reported DNA methylation associations with BMI could  
222 be observed in an independent cohort, we calculated DNA methylation scores  
223 from published effect sizes for 135 CpG sites from the *Mendelson et al* [15] meta-  
224 analysis of DNA methylation and BMI. Scores were obtained for each ARIES  
225 methylation profile by multiplying the CpG site methylation levels in that profile  
226 with the corresponding published effects estimates and then summing the  
227 products.

228 Genetic scores were similarly derived using effect sizes for 97 SNPs from the  
229 GIANT consortium BMI genome-wide association study (GWAS) [23]. Scores

230 were created using Plink V1.9 (<https://www.cog-genomics.org/plink2>) with the  
231 score and sum commands, however one of the SNPs did not meet imputation  
232 score filters (rs12016871), so the score was constructed using only 96 SNPs.

233 To perform simplified versions of Mendelian randomisation (MR), we used  
234 summary statistics from methylation quantitative trait loci (mQTL). mQTLs are  
235 genetic variants associated with DNA methylation [24]. To identify mQTLs we  
236 looked these up in mQTLdb [25], which contains mQTLs below a conservative p-  
237 value threshold of  $1e-07$ . If multiple mQTLs were identified for an individual CpG  
238 site, the one with the lowest p-value reported in the GIANT study for BMI was  
239 used as the mQTL for the MR analysis. If these mQTLs were unavailable, then  
240 proxies of these SNPs were obtained. These were SNPs with the next lowest p-  
241 value for that CpG, which were also present in the BMI GWAS data. We used the  
242 last p-value available in the BMI GWAS for each mQTL to maximise power. Of the  
243 135 CpG sites we queried, 89 had an instrument at this threshold.

## 244 **Statistical analysis**

### 245 Observational associations at the same time point

246 Linear regression models, with adjustments for covariates, were used to test  
247 observational associations. When testing for association between genetic and/or  
248 methylation scores of BMI, BMI was the dependent variable and the methylation  
249 and/or genetic score the independent variables. For models including a genetic  
250 score, age was included as a covariate. For models including a methylation score,  
251 the covariates included were age, sample type and estimated blood cell type

252 proportions. Sex was additionally included as a covariate in all models analysing  
253 child data. For predicting BMI, BMI was used as the dependent variable, and  
254 when predicting methylation, methylation score was used as the dependent  
255 variable.

256 To compare the relative contributions of genetic score and methylation score to  
257 BMI, an analysis of variance (ANOVA) test was carried out comparing the  
258 following three models, with the full model (model 3) being compared to each of  
259 the reduced models (models 1 and 2):

- 260 1. BMI ~ methylation score + covariates
- 261 2. BMI ~ genetic score + covariates
- 262 3. BMI ~ methylation score + genetic score + covariates

263 Finally, we investigated how BMI and DNA methylation change over the life  
264 course. Firstly, we calculated correlations of BMI and DNA methylation score at  
265 different time points for mothers and children separately. We then examined the  
266 correlation of BMI and DNA methylation scores between paired children and  
267 mothers at the different time points. Thirdly, we also calculated correlations for  
268 all individual CpG sites across the different timepoints and between paired  
269 child's cord blood DNA and mother's antenatal peripheral blood DNA values.

#### 270 Observational associations across the life course

271 To investigate whether DNA methylation might be predictive of later BMI or vice  
272 versa, we assessed associations between different time points in mothers and

273 children, using linear regression models, similar to those used in the  
274 observational analyses within the same time point.

### 275 Exploration of a causal relationship between BMI and DNA methylation

#### 276 *Cross-lagged model*

277 We analysed the temporal relationship of BMI and DNA methylation, using a  
278 cross-lagged model. This approach allows exploration of the relationships  
279 between earlier BMI and later methylation score in two separate systems, one in  
280 the children (using childhood and adolescence) and one in the mothers (using  
281 the antenatal and middle age time points). The R package OpenMx (version  
282 2.13.2) [26] was used to build a cross-lagged model, shown in Figures 3 and 4.  
283 Values for each of the free parameters or paths are estimated in the model. The  
284 paths were from earlier BMI to methylation at the same time point, later  
285 methylation and later BMI; and from earlier methylation to later BMI and  
286 methylation; and from later BMI to methylation at the same time point. Each  
287 path was sequentially tested in a sub model analysis, where that path was fixed  
288 to 0 and this sub model was compared against the full model using a likelihood  
289 ratio test. If a sub model had a significantly worse fit then that path was retained,  
290 but otherwise dropped because it was not important to the overall system.

#### 291 *Mendelian randomisation*

292 To investigate causal inference more directly, an approach based on MR was  
293 adopted. To test if changes in BMI cause changes in DNA methylation, we  
294 calculated genetic scores for BMI, as previously described, and tested the

295 association of this score with each of the 135 BMI-associated CpG sites. A  
296 Fisher's test was then applied to combine the association p-values for all 135  
297 association tests. To increase power, the adolescent and middle-aged mother's  
298 data was subsequently combined, and the association was tested again using a  
299 mixed model to account for relatedness.

300 Two-sample MR was applied to explore the reverse direction, i.e. a causal effect  
301 of DNA methylation on BMI. In this approach, summary statistics from the BMI  
302 GWAS were obtained for the mQTLs (or proxies of these, if these SNPs were  
303 unavailable) for the 135 BMI-associated CpG sites.

#### 304 Confounder analysis

305 To investigate whether any associations found between methylation and BMI  
306 were due to confounding by smoking or education, we compared linear models  
307 of BMI and DNA methylation with and without smoking (prenatal smoking  
308 during pregnancy for children and own smoking for adults) and education as  
309 covariates.

#### 310 Cardiovascular trait analyses

311 Linear regression models were used to test observational associations between  
312 the methylation and genetic scores for BMI against cardiovascular outcomes.  
313 These were performed with and without adjustment for BMI and using other  
314 covariates, as with other models. ANOVA tests were used to compare the relative  
315 contributions of BMI and the genetic and methylation scores and results are  
316 reported for these comparisons.

## 317 Results

### 318 Establishing associations between DNA methylation and BMI within time-points

319 The methylation score for BMI, derived from the *Mendelson et al* epigenome-  
 320 wide association study (EWAS) [15], was strongly associated with BMI in middle  
 321 aged mothers, explaining 10% of the variation in BMI ( $p=1.58E-23$ ). The  
 322 association was weaker in mothers during pregnancy (2% variance explained,  
 323  $p=2.31E-06$ ) and in children at birth (2% variance explained,  $p=6.83E-05$ ),  
 324 childhood (1% variance explained,  $p=2.23E-04$ ) and adolescence (3% variance  
 325 explained,  $p=3.91E-11$ ). Full results are presented in **Table 2**.

326 Table 2. Associations between methylation and genetic scores and BMI/birth  
 327 weight at the same time point.

|                    | N   | Associations between methylation score and BMI/birth weight                      |          |                                 | Associations between genetic score and BMI/birth weight |          |                                 |
|--------------------|-----|----------------------------------------------------------------------------------|----------|---------------------------------|---------------------------------------------------------|----------|---------------------------------|
|                    |     | Effect size <sup>1</sup> , in kg/m <sup>2</sup> per SD in methylation score (CI) | p-value  | Adjusted R-squared <sup>3</sup> | Effect size <sup>2</sup> (CI)                           | p-value  | Adjusted R-squared <sup>3</sup> |
| <b>Birth</b>       | 823 | 69.27 (35.35, 103.18)                                                            | 6.83E-05 | 0.02                            | -219.75 (-412.59, -26.90)                               | 0.03     | 0.004                           |
| <b>Childhood</b>   | 906 | 0.25 (0.12, 0.39)                                                                | 2.23E-04 | 0.01                            | 2.24 (1.45, 3.02)                                       | 2.72E-08 | 0.03                            |
| <b>Adolescence</b> | 770 | 0.97 (0.69, 1.26)                                                                | 3.91E-11 | 0.03                            | 5.25 (3.65, 6.85)                                       | 2.12E-10 | 0.05                            |
| <b>Pregnancy</b>   | 792 | 0.62 (0.36, 0.87)                                                                | 2.31E-06 | 0.02                            | 2.91 (1.38, 4.43)                                       | 1.95E-04 | 0.02                            |



|                   |     |                   |          |      |                   |          |      |
|-------------------|-----|-------------------|----------|------|-------------------|----------|------|
| <b>Middle-age</b> | 726 | 2.06 (1.67, 2.46) | 1.58E-23 | 0.10 | 4.72 (2.54, 6.90) | 2.45E-05 | 0.02 |
|-------------------|-----|-------------------|----------|------|-------------------|----------|------|

328 <sup>1</sup> From model adjusting for age (except at birth), sex (where applicable), sample type

329 (where applicable), and cell type proportions (B cell, CD4T, CD8T, Gran, Mono and NK).

330 <sup>2</sup> From model adjusting for age and sex (where applicable)

331 <sup>3</sup> Adjusted R-squared obtained from model with only the methylation score or genetic score

332 and no other covariates.

333 Genetic scores for BMI, derived from published GWAS summary statistics [23],

334 were also associated with BMI, with the strongest association found for children

335 in adolescence with 5% variance explained in BMI ( $p=2.12E-10$ ) and weaker

336 associations found at all other time points (see **Table 2** for full results).

337 The genetic and methylation score associations appear to be mostly independent

338 (**Table 3**), as the combined model with both genetic and methylation scores

339 performed better than both the methylation score (ANOVA test p-values ranged

340 from  $1.93E-10$  to 0.04) and genetic score models (ANOVA test p-values ranged

341 from  $4.55E-21$  to  $1.28E-03$ ) alone for all time points. This validates previous

342 findings that the genotype and DNA methylation explain independent subsets of

343 BMI variation [13,15].

344 Table 3 Results from combined model and ANOVA comparing this with models

345 for methylation and genetic scores.

|                    | <b>Combined model adjusted R-squared<sup>1</sup></b> | <b>ANOVA (model 1 vs model 3)</b> | <b>ANOVA (model 2 vs model 3)</b> |
|--------------------|------------------------------------------------------|-----------------------------------|-----------------------------------|
| <b>Birth</b>       | 0.03                                                 | 0.04                              | 1.56E-09                          |
| <b>Childhood</b>   | 0.04                                                 | 9.03E-09                          | 1.28E-03                          |
| <b>Adolescence</b> | 0.08                                                 | 1.93E-10                          | 5.28E-11                          |
| <b>Pregnancy</b>   | 0.04                                                 | 2.22E-04                          | 5.36E-05                          |
| <b>Middle-age</b>  | 0.12                                                 | 2.77E-05                          | 4.55E-21                          |

346 <sup>1</sup> Adjusted R-squared obtained from model with both the methylation and the genetic

347 scores and no other covariates

348 Model 1 includes the methylation score, model 2 includes the genetic score and model 3 is

349 the combined model including the methylation and genetic score. All models also included

350 the relevant covariates

### 351 Stability of phenotypic values over time and between generations

352 We evaluated the extent to which individual BMI levels correlated over time and

353 between mothers and children. The strongest BMI correlations were observed in

354 children between age 7 and adolescence and in mothers between pregnancy and

355 middle age ( $R \sim 0.7$ ). Intermediate correlations were observed between

356 children and mothers at all time points ( $R \sim 0.3$ ) except birth. Lowest BMI

357 correlations ( $R \sim 0.15$ ) were observed with birth, likely because birthweight is a

358 different measure than BMI (**Figure 1**).

359 Figure 1. Correlation matrix of BMI in children (birth, childhood, adolescence)

360 and mothers (pregnancy and middle-age).

361 *Legend: This correlation matrix shows the correlations over time for BMI at all time points*  
362 *in children and mothers. There is a correlation of BMI in children and mothers over time*  
363 *and between paired mother and children's BMI.*

364 The BMI methylation score correlations exhibited similar patterns but were  
365 generally lower than for BMI. Strongest correlations were observed in children  
366 between age 7 and adolescence and in mothers between pregnancy and middle  
367 age ( $R \sim 0.5$ ). All other correlations were between 0.2 and 0.25. Thus,  
368 methylation scores at birth were more highly correlated with later time points  
369 and with maternal methylation scores than birthweight and BMI (**Figure 2**).

370 Given the weak association of methylation in childhood with BMI, factors other  
371 than BMI likely contribute to the correlation of DNA methylation over time and  
372 between mothers and children.

373 Figure 2. Correlation matrix of methylation score in children (birth, childhood,  
374 adolescence) and mothers (pregnancy and middle-age).

375 *Legend: This correlation matrix shows the correlations over time for overall methylation*  
376 *score at all time points in children and mothers. There is a correlation of methylation score*  
377 *in children and mothers over time and between paired mother and children's methylation*  
378 *scores.*

379 Finally, to examine whether there are particular CpG sites that correlate more  
380 strongly over time and between paired children and mothers, we tested the  
381 correlation of each site at different time points (Supplementary Table 1,  
382 Additional file 1). We observe that median correlations across all CpG sites  
383 follow a similar pattern to correlations of the methylation scores over time,

384 where the strongest correlations were observed in children between age 7 and  
 385 adolescence and in mothers between pregnancy and middle age ( $R \sim 0.2$ ). Only  
 386 these two sets of timepoints have CpG sites with correlation  $R > 0.5$ . There are  
 387 six such CpG sites for each and two of these are common to both (cg16611584,  
 388 cg24145109). Both of these CpG sites are highly correlated across all time  
 389 points.

390 Predicting future BMI with past DNA methylation scores

391 We next investigated whether the BMI methylation score was predictive of BMI  
 392 at later timepoints (**Table 4**) or vice versa (if BMI was predictive of methylation  
 393 score at later timepoints; **Table 5**). We observed some evidence that methylation  
 394 score in childhood could be predictive of BMI in adolescence ( $p=0.004$ ), although  
 395 the association disappeared when adjusting for childhood BMI ( $p=0.20$ ) and  
 396 there was stronger evidence for the converse, that is BMI in childhood predicting  
 397 adolescent DNA methylation ( $p=1.52E-06$  even when adjusting for childhood  
 398 methylation score). We observed the same in the mothers between pregnancy  
 399 and middle age; that is, the association between antenatal (earlier) methylation  
 400 score and middle-age (later) BMI ( $p=0.02$ ) essentially disappears when adjusting  
 401 for antenatal (earlier) BMI ( $p=0.13$ ). Also, the association between antenatal  
 402 (earlier) BMI and middle age (later) DNA methylation is much stronger even  
 403 when adjusting for antenatal (earlier) methylation score ( $p=5.48E-11$ ).

404 Table 4. Associations between methylation score and BMI at later time points.

|  | N | Unadjusted for current BMI/birthweight <sup>1</sup> | Adjusted for current BMI/birthweight <sup>1</sup> |
|--|---|-----------------------------------------------------|---------------------------------------------------|
|--|---|-----------------------------------------------------|---------------------------------------------------|

|                                                           |     | Effect size <sup>1</sup> | CI          | p-value  | Adjusted R-squared <sup>2</sup> | Effect size <sup>1</sup> | CI          | p-value |
|-----------------------------------------------------------|-----|--------------------------|-------------|----------|---------------------------------|--------------------------|-------------|---------|
| <b>Methylation score at birth, BMI in childhood</b>       | 830 | -0.03                    | -0.18, 0.13 | 0.72     | -0.0004                         | -0.07                    | -0.22, 0.07 | 0.36    |
| <b>Methylation score at birth, BMI in adolescence</b>     | 712 | 0.06                     | -0.25, 0.36 | 0.70     | -0.001                          | -0.05                    | -0.35, 0.25 | 0.73    |
| <b>Methylation score in childhood, BMI in adolescence</b> | 762 | 0.41                     | 0.13, 0.69  | 0.004    | 0.005                           | 0.13                     | -0.07, 0.34 | 0.20    |
| <b>Antenatal methylation score, BMI in middle-age</b>     | 765 | 0.80                     | 0.44, 1.17  | 1.92E-05 | 0.02                            | 0.19                     | -0.06, 0.44 | 0.13    |

405 <sup>1</sup> From model adjusting for age (except at birth), sex (where applicable), sample type

406 (where applicable), and cell type proportions (B cell, CD4T, CD8T, Gran, Mono and NK).

407 <sup>2</sup> Adjusted R-squared obtained from model with only the methylation score and no other

408 covariates

409 Table 5. Associations between BMI/birthweight and methylation score at later

410 time points.

|                                                    | N   | Unadjusted for current methylation score <sup>1</sup> |                  |         |                                 | Adjusted for current methylation score <sup>1</sup> |                   |         |  |
|----------------------------------------------------|-----|-------------------------------------------------------|------------------|---------|---------------------------------|-----------------------------------------------------|-------------------|---------|--|
|                                                    |     | Effect size <sup>1</sup>                              | CI               | p-value | Adjusted R-squared <sup>2</sup> | Effect size <sup>1</sup>                            | CI                | p-value |  |
| <b>Birthweight, methylation score in childhood</b> | 814 | -0.0001                                               | -0.0002, 0.00004 | 0.17    | 0.003                           | -0.0002                                             | -0.0003, -0.00006 | 0.006   |  |
| <b>Birthweight, methylation</b>                    | 812 | 0.000003                                              | -0.0001, 0.0001  | 0.96    | 0.002                           | -0.00008                                            | -0.0002, 0.00005  | 0.22    |  |

|                                                           |     |      |            |          |      |      |            |          |
|-----------------------------------------------------------|-----|------|------------|----------|------|------|------------|----------|
| <b>score in adolescence</b>                               |     |      |            |          |      |      |            |          |
| <b>BMI in childhood, methylation score in adolescence</b> | 891 | 0.09 | 0.06, 0.12 | 3.05E-09 | 0.02 | 0.06 | 0.04, 0.09 | 1.52E-06 |
| <b>Antenatal BMI, methylation score in middle-age</b>     | 851 | 0.07 | 0.05, 0.08 | 1.42E-16 | 0.06 | 0.05 | 0.03, 0.05 | 5.48E-11 |

411 <sup>1</sup> From model adjusting for age (except at birth), sex (where applicable), sample type

412 (where applicable), and cell type proportions (B cell, CD4T, CD8T, Gran, Mono and NK).

413 <sup>2</sup> Adjusted R-squared obtained from model with only the methylation score and no other

414 covariates

#### 415 Exploration of temporal relationships between BMI and DNA methylation

416 To further evaluate the temporal associations between DNA methylation and

417 BMI, we used cross-lagged models to test which paths from earlier trait

418 measures and scores were important for later trait measures and scores.

419 Agreeing with the results from adjusted linear models, these did reveal a

420 pathway between BMI in childhood and methylation score in adolescence.

421 **Figure 3** shows the estimates and variances/covariances obtained from the

422 main model. The only path that could be dropped from the model without

423 affecting model fit was between childhood methylation and adolescent BMI

424 (p=0.35 for this path and p < 1.79E-4 for all other paths; Supplementary Figure 1,

425 Additional file 1). Cross-lagged model fits in mothers (**Figure 4**) also revealed a

426 pathway from (earlier) BMI in pregnancy to (later) DNA methylation in middle-

427 age. The only path that could be dropped from the model without affecting

428 model fit was from DNA methylation in pregnancy (earlier) and BMI in middle-  
429 age (later) ( $p=0.20$  for this path and  $p<3.65E-09$  for all other paths;  
430 Supplementary Figure 2, Additional file 1).

431 Figure 3. Pathway diagram for the cross-lagged model for childhood and  
432 adolescence.

433 *Legend: This diagram shows the observed variables in boxes. Single headed arrows*  
434 *indicate linear regressions and double headed, curved arrows indicate*  
435 *variances/covariances. Estimates for the linear relationships are shown on the arrows, as*  
436 *are the values for variances and covariances.*

437 Figure 4. Pathway diagram for the cross-lagged model for pregnancy and middle-  
438 aged mothers.

439 *Legend: This diagram shows the observed variables in boxes. Single headed arrows*  
440 *indicate linear regressions and double headed, curved arrows indicate*  
441 *variances/covariances. Estimates for the linear relationships are shown on the arrows, as*  
442 *are the values for variances and covariances.*

443 Mendelian randomisation does not support a causal relationship of DNAm on  
444 BMI

445 We used two-sample MR to explore causal relationships between DNA  
446 methylation and BMI (Supplementary Table 2, Additional file 1). Using the BMI  
447 genetic score as an instrumental variable for BMI, we found little evidence for a  
448 causal link of BMI on each of the 135 CpG sites used to construct the methylation  
449 score ( $p$ -value range:  $1.63E-03$  –  $9.99E-01$ , for all timepoints, with a Bonferroni-

450 adjusted p-value threshold of  $3.7E-04$ ). A combined p-value for all 135 CpG sites  
451 obtained using Fisher's method similarly indicated no strong association  
452 between the genetic score and methylation (p-value range: 0.82 – 1.00, for all  
453 timepoints). Furthermore, even when this analysis was repeated with a mixed  
454 model including data from both adolescents and middle-aged mothers to  
455 increase the power (Supplementary Table 3, Additional file 1), there was still  
456 little evidence of association (p-value range:  $2.13E-02$  –  $9.98E-01$ ).

457 The reverse causal direction, methylation variation causing BMI variation, was  
458 investigated using mQTLs for the 135 methylation score CpG sites as  
459 instrumental variables. These individual tests did not indicate a causal link  
460 (Bonferroni-adjusted p-value threshold of  $3.7E-04$ ; Supplementary Table 4,  
461 Additional file 1) although combining the test p-values using Fisher's method did  
462 provide weak evidence for a causal association (Fisher's p-value = 0.03).

#### 463 Confounder analyses

464 Sensitivity analyses showed that associations between BMI and methylation  
465 score remained unaffected by the inclusion of potential confounders in the  
466 majority of models (Supplementary Table 5, Additional file 1). Smoking and  
467 education appeared to be associated with methylation score in some models,  
468 however, most of the associations between BMI and methylation score survived  
469 these adjustments ( $p < 0.007 = 0.05/7$ ).

#### 470 Associations with cardiovascular traits



471 Finally, given that BMI is a risk factor for cardiovascular disease, we tested  
472 within-timepoint associations between the DNA methylation and genetic scores  
473 for BMI and cardiovascular traits to examine if the specificity of these scores.  
474 Firstly, we observed that methylation associations were partially independent of  
475 BMI for LDL ( $p=0.02$ ) and glucose ( $p=0.03$ ) in adolescence and triglycerides  
476 ( $p=3.00E-03$ ), LDL ( $p=0.01$ ) and SBP ( $p=0.05$ ) in mothers at middle age.  
477 Similarly, we observed that methylation associations were partially independent  
478 of genetic effects on SBP in adolescence ( $p=0.05$ ) and triglycerides in mothers  
479 ( $p=3.27E-03$ ) (Supplementary Table 6, Additional file 1). We also observed that  
480 genetic effects were partially independent of BMI for LDL ( $p=0.03$ ), glucose  
481 ( $0.05$ ) and SBP ( $0.03$ ) in adolescence and triglycerides ( $2.01E-04$ ), LDL ( $0.02$ )  
482 and SBP ( $0.02$ ) in mothers. Finally, we observed that the genetic effects were  
483 partially independent of methylation and BMI for LDL ( $p=0.02$ ) and glucose  
484 ( $p=0.03$ ) in adolescence and triglycerides ( $p=3.80E-03$ ), LDL ( $p=0.01$ ) and SBP  
485 ( $p=0.02$ ) in mothers (Supplementary Table 7, Additional file 1).

486

487

488

489

490

491

## 492 **Discussion**

493 In this study we have demonstrated strong associations between DNA  
494 methylation and genetic scores for BMI [15] in both adults and children.  
495 Importantly, the use of temporal data indicates that the DNA methylation scores  
496 are not predictive. While the association between DNA methylation scores and  
497 BMI within time point are strong, the associations between earlier methylation  
498 scores later BMI are weak, and these signals do not improve the model of simply  
499 using earlier BMI as a predictor for later BMI. Hence, it may be more appropriate  
500 to term the DNA methylation score as a biomarker rather than a cause or  
501 predictor of BMI.

502 We observed within-timepoint associations between DNA methylation score for  
503 BMI and health outcomes for which BMI is a risk factor. These associations were  
504 independent of BMI and genotype, suggesting that the DNA methylation – BMI  
505 associations might arise due to unmeasured confounders that also influence  
506 those outcomes. DNA methylation could be used as a biomarker for these  
507 outcomes, above and beyond BMI and genetic variation.

508 Our study builds upon previous research in this field showing that both genetic  
509 and environmental factors contribute to variance in BMI [5,23]. Previous work  
510 investigating the relationship between DNA methylation and BMI has found  
511 associations with specific DNA methylation sites [10–12]. However results from  
512 these studies are fairly inconsistent and practical implications of these  
513 associations have not yet been identified [27]. In extension of this previous  
514 research we have used 135 CpG sites, identified in an EWAS meta-analysis [15],

515 to create methylation scores that are also associated with BMI in an independent  
516 cohort. The main novel component of our study is that we look across the life  
517 course in children and adults. Another study investigating DNA methylation  
518 profile and obesity in children aged 6-14 years also found an association  
519 between childhood obesity and a separate set of differentially methylated CpG  
520 sites, supporting our finding that DNA methylation is associated with BMI in  
521 adolescents [28]. Our findings in younger children were however weaker and  
522 could be due to basing our analysis on methylation at CpG sites associated with  
523 BMI in adults.

524 We have also investigated the nature of these associations further and found that  
525 there may be some predictive capability of earlier BMI to later DNA methylation  
526 at multiple time points, however we found no evidence to suggest this  
527 association is causal, which could be due to several reasons. Firstly, it may be  
528 that there is a lack of power in these analyses for MR to detect a causal  
529 relationship. The *Wahl et al* paper [14] suggests that with larger sample sizes the  
530 direction of effect is likely to be from BMI to DNA methylation. Therefore, it is  
531 possible that with a larger sample size we could confirm this direction of  
532 causality. It could also be that there are other unknown confounders, which are  
533 mediating this effect and future research should focus on investigating this  
534 further. Our MR analyses suggest a weak aggregate causal association from DNA  
535 methylation to BMI, however due to the DNAm instruments being enriched for  
536 genic regions, this association is unlikely to be stronger than expected against a  
537 more appropriate null that reflects that BMI is more strongly influenced by  
538 genetic variants in genic regions [23]. We also found associations of the BMI

539 DNAm scores with cardiovascular outcomes. If BMI causes changes in DNAm, as  
540 our analyses seem to suggest, then DNAm changes may fall on the causal  
541 pathway between BMI and these cardiovascular outcomes. Therefore, DNAm  
542 scores may have potential use as predictors of cardiovascular outcomes,  
543 although generalisability to other populations would need to be confirmed. This  
544 has been suggested in previous studies for diabetes [14,29] and insulin-  
545 resistance [30].

#### 546 Limitations

547 This study is subject to a number of limitations. Firstly, whilst the size of the  
548 ARIES cohort is larger than or equivalent to samples used in other DNA  
549 methylation studies, it may still be too small to detect some associations, and this  
550 may be why we do not find any causal association for BMI to DNA methylation,  
551 as discussed above. The ARIES mQTL database used in the two-sample MR had a  
552 total sample size of 3,948, although this was split across three time points in  
553 approximately the same children and two time points in the mothers. We used  
554 the GIANT cohort for BMI in the two-sample MR and included 235,522  
555 participants in these analyses. The GIANT sample size is much larger and  
556 therefore it is difficult to directly compare the strength of causal evidence in each  
557 direction between these samples. Secondly, whilst it is a strength of our study  
558 that we use multiple time points, in the mothers one of these is during pregnancy  
559 so these findings may not be generalizable outside of pregnancy, or generalizable  
560 to males. As with any epidemiological study there may also be measurement  
561 error present in our phenotypic data, for example smoking data was collected via  
562 self-report and there may be biases present in this data because of this. In

563 addition, measurement error may be present in the genotyping data and  
564 methylation data. Finally, the DNA methylation data was collected from blood  
565 samples which may not be indicative of other tissue methylation levels such as  
566 adipose tissue which may be more relevant in a study looking at potential causal  
567 relationships between BMI and DNAm, however we assume the two may be  
568 correlated to an extent.

## 569 **Conclusions**

570 In conclusion, our study finds that DNA methylation scores, as have so far been  
571 generated, are unlikely to be predictive of future BMI using earlier DNA  
572 methylation levels, and therefore is more appropriately considered a biomarker.  
573 This indicates that conducting EWAS using DNAm values and trait values  
574 measured at the same time point is not an effective strategy when attempting to  
575 create predictors. Therefore, future studies should perform EWAS that test for  
576 early DNAm values against later health outcomes to evaluate whether this may  
577 enable creating an effective predictor, which could then be tested in other  
578 populations.

579

580

581

582

583 **Abbreviations:**

584 BMI: Body mass index; ARIES: Accessible Resource for Integrated Epigenomic  
585 Studies; ALSPAC: Avon Longitudinal Study of Parents and Children; LDL: Low-  
586 density lipoprotein; SBP: Systolic blood pressure; MR: Mendelian randomisation;  
587 mQTL: methylation quantitative trait loci; ANOVA: Analysis of variance; EWAS:  
588 Epigenome-wide association study; GWAS: Genome-wide association study.

589 **Declarations:**

590 Ethics approval and consent to participate:

591 Ethical approval for the study was obtained from the ALSPAC Ethics and Law  
592 Committee and the Local Research Ethics Committees. Informed consent for the  
593 use of data collected via questionnaires and clinics was obtained from  
594 participants following the recommendations of the ALSPAC Ethics and Law  
595 Committee at the time.

596 Consent for publication:

597 Not applicable

598 Availability of data and material:

599 The ALSPAC data management plan (  
600 [http://www.bristol.ac.uk/alspac/researchers/data-access/documents/alspac-  
601 data-management-plan.pdf](http://www.bristol.ac.uk/alspac/researchers/data-access/documents/alspac-<br/>601 data-management-plan.pdf)) describes in detail the policy regarding data sharing,  
602 which is through a system of managed open access. The steps below highlight

603 how to apply for access to the data included in this paper and all other ALSPAC  
604 data. The datasets used in this analysis are linked to ALSPAC project number  
605 B2154; please quote this project number during your application.

606 • 1. Please read the [ALSPAC access policy \(PDF, 627 kB\)](#) which describes  
607 the process of accessing the data and samples in detail, and outlines the  
608 costs associated with doing so.

609 • 2. You may also find it useful to browse the fully searchable [ALSPAC](#)  
610 [research proposals database](#), which lists all research projects that have  
611 been approved since April 2011.

612 • 3. Please [submit your research proposal](#) for consideration by the ALSPAC  
613 Executive Committee. You will receive a response within 10 working days  
614 to advise you whether your proposal has been approved.

615 If you have any questions about accessing data, please email [alspac-  
data@bristol.ac.uk](mailto:alspac-<br/>616 data@bristol.ac.uk).

#### 617 Competing Interests:

618 The authors declare that they have no competing interests.

#### 619 Funding:

620 This work was supported in part by the UK Medical Research Council Integrative  
621 Epidemiology Unit at the University of Bristol (Grant ref: MC\_UU\_00011/5). The  
622 UK Medical Research Council and Wellcome (Grant ref: 102215/2/13/2) and the

623 University of Bristol provide core support for ALSPAC. This publication is the  
624 work of the authors and ZER, MJS, CLR, OSPD and GH will serve as guarantors for  
625 the contents of this paper. A comprehensive list of grants funding is available on  
626 the ALSPAC website  
627 ([http://www.bristol.ac.uk/alspac/external/documents/grant-](http://www.bristol.ac.uk/alspac/external/documents/grant-acknowledgements.pdf)  
628 [acknowledgements.pdf](http://www.bristol.ac.uk/alspac/external/documents/grant-acknowledgements.pdf)); This research was specifically funded by Wellcome  
629 Trust (086676/Z/08/Z), Wellcome Trust and Medical Research Council  
630 (076467/Z/05/Z), Wellcome Trust (WT092830/Z/10/Z), the British Heart  
631 Foundation (SP/07/008/24066). ZR was supported by a Wellcome Trust PhD  
632 studentship (Grant ref: 109104/Z/15/Z). MJS was supported by the ESRC  
633 (ES/N000498/1). Methylation data in the ALSPAC cohort were generated as part  
634 of the UK BBSRC funded (BB/I025751/1 and BB/I025263/1) Accessible  
635 Resource for Integrated Epigenomic Studies  
636 (ARIES, <http://www.ariesepigenomics.org.uk>). Child GWAS data was generated  
637 by Sample Logistics and Genotyping Facilities at Wellcome Sanger Institute and  
638 LabCorp (Laboratory Corporation of America) using support from 23andMe.  
639 Preparation of mothers GWAS data was specifically funded by the Wellcome  
640 Trust (WT088806). GH was funded by the Wellcome Trust and the Royal Society  
641 [208806/Z/17/Z].

642 Authors' contributions:

643 ZER, MJS, GH and CLR contributed to the planning and design of the analysis and  
644 drafting of this paper. OSPD advised on the use of the cross-lagged model design  
645 and contributed to final drafts of this paper.



646 Acknowledgements:

647 We are extremely grateful to all the families who took part in this study, the  
648 midwives for their help in recruiting them, and the whole ALSPAC team, which  
649 includes interviewers, computer and laboratory technicians, clerical workers,  
650 research scientists, volunteers, managers, receptionists and nurses.

651 Additional files:

652 Additional file 1: This contains supplementary tables S1-S7 and supplementary  
653 figures S1-S2. File format is .docx.

654

655

656

657

658

659

660

661

662

## 663 **References**

- 664 1. Whitlock G, Lewington S, Sherliker P, Clarke R, Emberson J, Halsey J, et al.  
665 Body-mass index and cause-specific mortality in 900 000 adults: collaborative  
666 analyses of 57 prospective studies. *Lancet*. 2009;373:1083–96.
- 667 2. Finucane MM, Stevens GA, Cowan MJ, Danaei G, Lin JK, Paciorek CJ, et al.  
668 National, regional, and global trends in body-mass index since 1980: systematic  
669 analysis of health examination surveys and epidemiological studies with 960  
670 country-years and 9·1 million participants. *Lancet*. 2011;377:557–67.
- 671 3. Tam G, Yeung MPS. A systematic review of the long-term effectiveness of  
672 work-based lifestyle interventions to tackle overweight and obesity. *Prev. Med.*  
673 (Baltim). Academic Press; 2018. p. 54–60.
- 674 4. Sim LA, Lebow J, Wang Z, Koball A, Murad MH. Brief Primary Care Obesity  
675 Interventions: A Meta-analysis. *Pediatrics*. American Academy of Pediatrics;  
676 2016;138:e20160149–e20160149.
- 677 5. Hemani G, Yang J, Vinkhuyzen A, Powell JE, Willemsen G, Hottenga JJ, et al.  
678 Inference of the genetic architecture underlying bmi and height with the use of  
679 20,240 sibling pairs. *Am. J. Hum. Genet*. Elsevier; 2013;93:865–75.
- 680 6. Elks CE, den Hoed M, Zhao JH, Sharp SJ, Wareham NJ, Loos RJF, et al. Variability  
681 in the heritability of body mass index: a systematic review and meta-regression.  
682 *Front. Endocrinol. (Lausanne)*. 2012;3:29.

- 683 7. Fazzari MJ, Grealley JM. Introduction to epigenomics and epigenome-wide  
684 analysis. *Methods Mol. Biol.* 2010;620:243–65.
- 685 8. Dogan M V, Grumbach IM, Michaelson JJ, Philibert RA. Integrated genetic and  
686 epigenetic prediction of coronary heart disease in the Framingham Heart Study.  
687 *PLoS One. Public Library of Science*; 2018;13:e0190549.
- 688 9. Zhang Y, Wilson R, Heiss J, Breitling LP, Saum KU, Schöttker B, et al. DNA  
689 methylation signatures in peripheral blood strongly predict all-cause mortality.  
690 *Nat. Commun. Nature Publishing Group*; 2017;8:14617.
- 691 10. Dick KJ, Nelson CP, Tsaprouni L, Sandling JK, Aïssi D, Wahl S, et al. DNA  
692 methylation and body-mass index: a genome-wide analysis. *Lancet. Elsevier*;  
693 2014;383:1990–8.
- 694 11. Aslibekyan S, Demerath EW, Mendelson M, Zhi D, Guan W, Liang L, et al.  
695 Epigenome-wide study identifies novel methylation loci associated with body  
696 mass index and waist circumference. *Obesity.* 2015;23:1493–501.
- 697 12. Demerath EW, Guan W, Grove ML, Aslibekyan S, Mendelson M, Zhou Y-H, et  
698 al. Epigenome-wide association study (EWAS) of BMI, BMI change and waist  
699 circumference in African American adults identifies multiple replicated loci.  
700 *Hum. Mol. Genet.* 2015;24:4464–79.
- 701 13. Shah S, Bonder MJ, Marioni RE, Zhu Z, McRae AF, Zhernakova A, et al.  
702 Improving Phenotypic Prediction by Combining Genetic and Epigenetic  
703 Associations. *Am. J. Hum. Genet. Elsevier*; 2015;97:75–85.

- 704 14. Wahl S, Drong A, Lehne B, Loh M, Scott WR, Kunze S, et al. Epigenome-wide  
705 association study of body mass index, and the adverse outcomes of adiposity.  
706 Nature. 2016;
- 707 15. Mendelson MM, Marioni RE, Joehanes R, Liu C, Hedman ÅK, Aslibekyan S, et  
708 al. Association of Body Mass Index with DNA Methylation and Gene Expression in  
709 Blood Cells and Relations to Cardiometabolic Disease: A Mendelian  
710 Randomization Approach. Lewis C, editor. PLoS Med. Public Library of Science;  
711 2017;14:e1002215.
- 712 16. Khera A V., Chaffin M, Wade KH, Zahid S, Brancale J, Xia R, et al. Polygenic  
713 Prediction of Weight and Obesity Trajectories from Birth to Adulthood. Cell. Cell  
714 Press; 2019;177:587-596.e9.
- 715 17. Relton CL, Gaunt T, McArdle W, Ho K, Duggirala A, Shihab H, et al. Data  
716 Resource Profile: Accessible Resource for Integrated Epigenomic Studies  
717 (ARIES). Int. J. Epidemiol. 2015;
- 718 18. Fraser A, Macdonald-Wallis C, Tilling K, Boyd A, Golding J, Davey Smith G, et  
719 al. Cohort Profile: the Avon Longitudinal Study of Parents and Children: ALSPAC  
720 mothers cohort. Int. J. Epidemiol. 2013;42:97–110.
- 721 19. Boyd A, Golding J, Macleod J, Lawlor DA, Fraser A, Henderson J, et al. Cohort  
722 Profile: the 'children of the 90s'--the index offspring of the Avon Longitudinal  
723 Study of Parents and Children. Int. J. Epidemiol. 2013;42:111–27.
- 724 20. Min JL, Hemani G, Davey Smith G, Relton C, Suderman M. Meffil: efficient

- 725 normalization and analysis of very large DNA methylation datasets.  
726 Bioinformatics. Oxford University Press; 2018;34:3983–9.
- 727 21. Fortin J-P, Labbe A, Lemire M, Zanke BW, Hudson TJ, Fertig EJ, et al.  
728 Functional normalization of 450k methylation array data improves replication in  
729 large cancer studies. Genome Biol. BioMed Central; 2014;15:503.
- 730 22. Houseman EA, Accomando WP, Koestler DC, Christensen BC, Marsit CJ,  
731 Nelson HH, et al. DNA methylation arrays as surrogate measures of cell mixture  
732 distribution. BMC Bioinformatics. 2012;13:86.
- 733 23. Locke AE, Kahali B, Berndt SI, Justice AE, Pers TH, Day FR, et al. Genetic  
734 studies of body mass index yield new insights for obesity biology. Nature. Nature  
735 Publishing Group, a division of Macmillan Publishers Limited. All Rights  
736 Reserved.; 2015;518:197–206.
- 737 24. Smith AK, Kilaru V, Kocak M, Almli LM, Mercer KB, Ressler KJ, et al.  
738 Methylation quantitative trait loci (meQTLs) are consistently detected across  
739 ancestry, developmental stage, and tissue type. BMC Genomics. BioMed Central;  
740 2014;15:145.
- 741 25. Gaunt TR, Shihab HA, Hemani G, Min JL, Woodward G, Lyttleton O, et al.  
742 Systematic identification of genetic influences on methylation across the human  
743 life course. Genome Biol. BioMed Central; 2016;17:61.
- 744 26. Boker S, Neale M, Maes H, Wilde M, Spiegel M, Brick T, et al. OpenMx: An  
745 Open Source Extended Structural Equation Modeling Framework.

746 Psychometrika. 2011;76:306–17.

747 27. van Dijk SJ, Molloy PL, Varinli H, Morrison JL, Muhlhausler BS, Buckley M, et

748 al. Epigenetics and human obesity. *Int. J. Obes.* Nature Publishing Group;

749 2015;39:85–97.

750 28. Huang RC, Garratt ES, Pan H, Wu Y, Davis EA, Barton SJ, et al. Genome-wide

751 methylation analysis identifies differentially methylated CpG loci associated with

752 severe obesity in childhood. *Epigenetics.* Taylor & Francis; 2015;10:995–1005.

753 29. Dayeh T, Tuomi T, Almgren P, Perfilyev A, Jansson PA, de Mello VD, et al. DNA

754 methylation of loci within ABCG1 and PHOSPHO1 in blood DNA is associated

755 with future type 2 diabetes risk. *Epigenetics.* Taylor & Francis; 2016;11:482–8.

756 30. Krause C, Sievert H, Geißler C, Grohs M, El Gammal AT, Wolter S, et al. Critical

757 evaluation of the DNA-methylation markers ABCG1 and SREBF1 for Type 2

758 diabetes stratification. *Epigenomics.* Future Medicine Ltd London, UK;

759 2019;11:885–97.

760

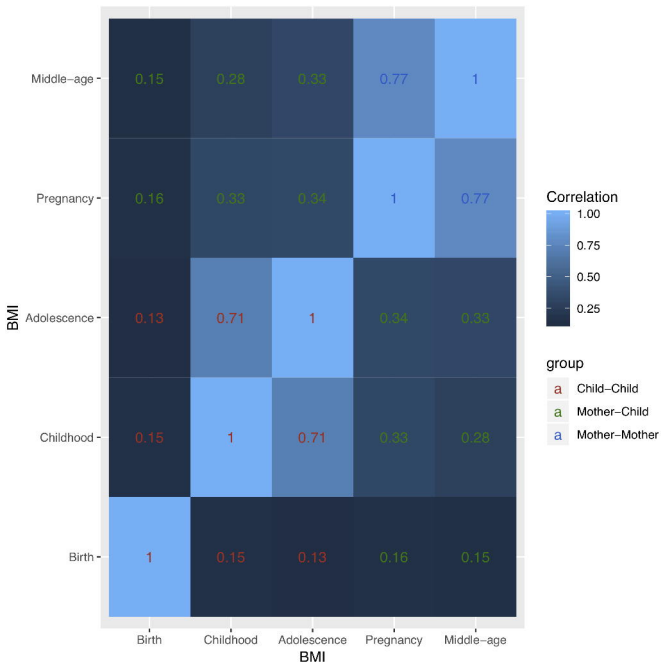

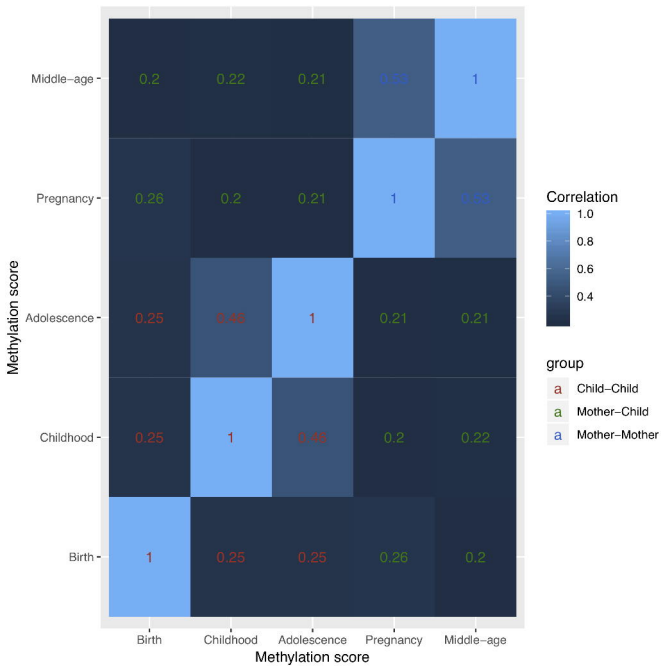



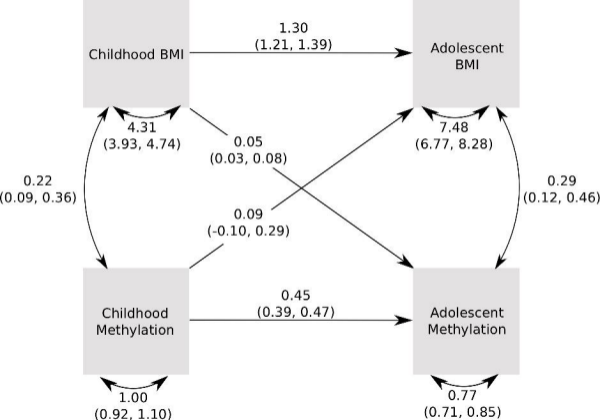

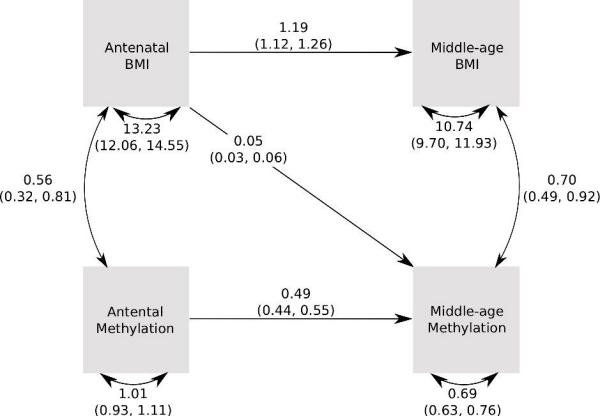

Source: https://www.biorxiv.org/content/10.1101/2019.12.16.877464v1.full.pdf
